# Supplementary material
Source: MDPI journal article supplement (https://www.mdpi.com/2673-1592/5/1/14)
Supplement: s1 [file s1 › Supplementary.pdf]

## Disk13

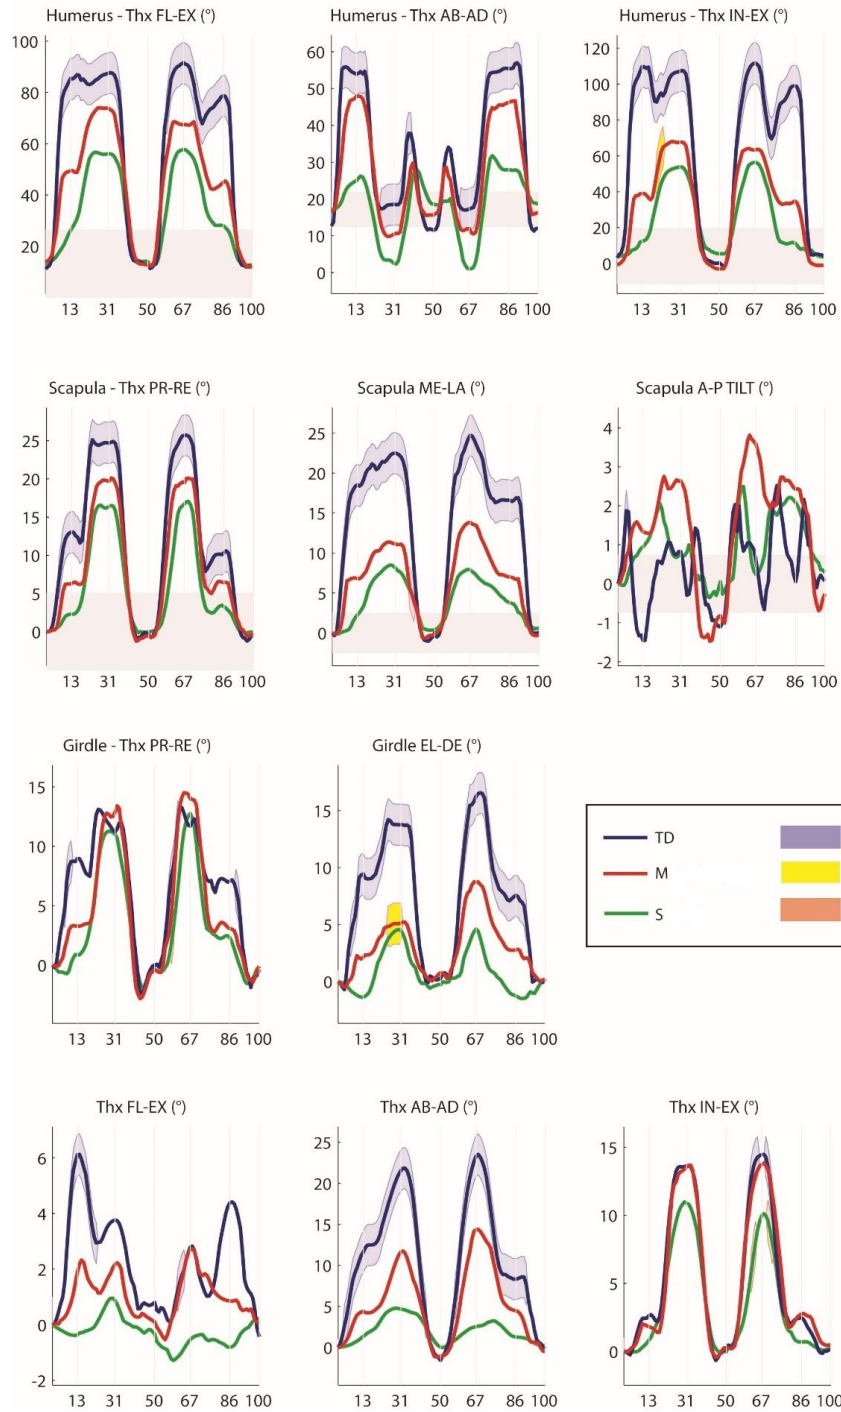

Figure S1: Kinematics for the task Disk13, from distal to proximal, as percentage of the motion cycle.

## Jar

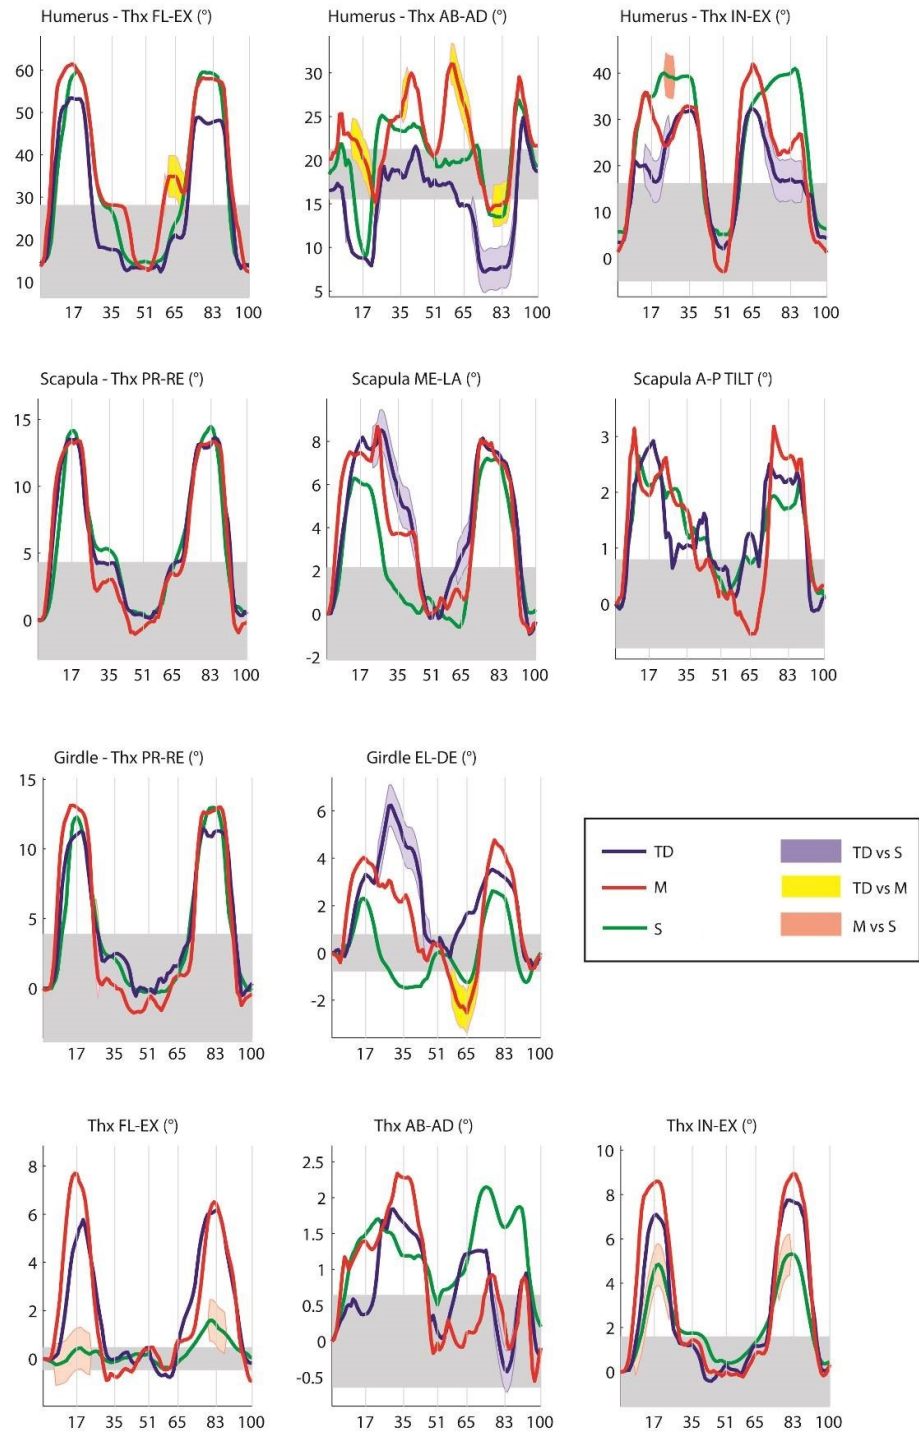

Figure S2: Kinematics for the task Jar, from distal to proximal, as percentage of the motion cycle.

## Plate

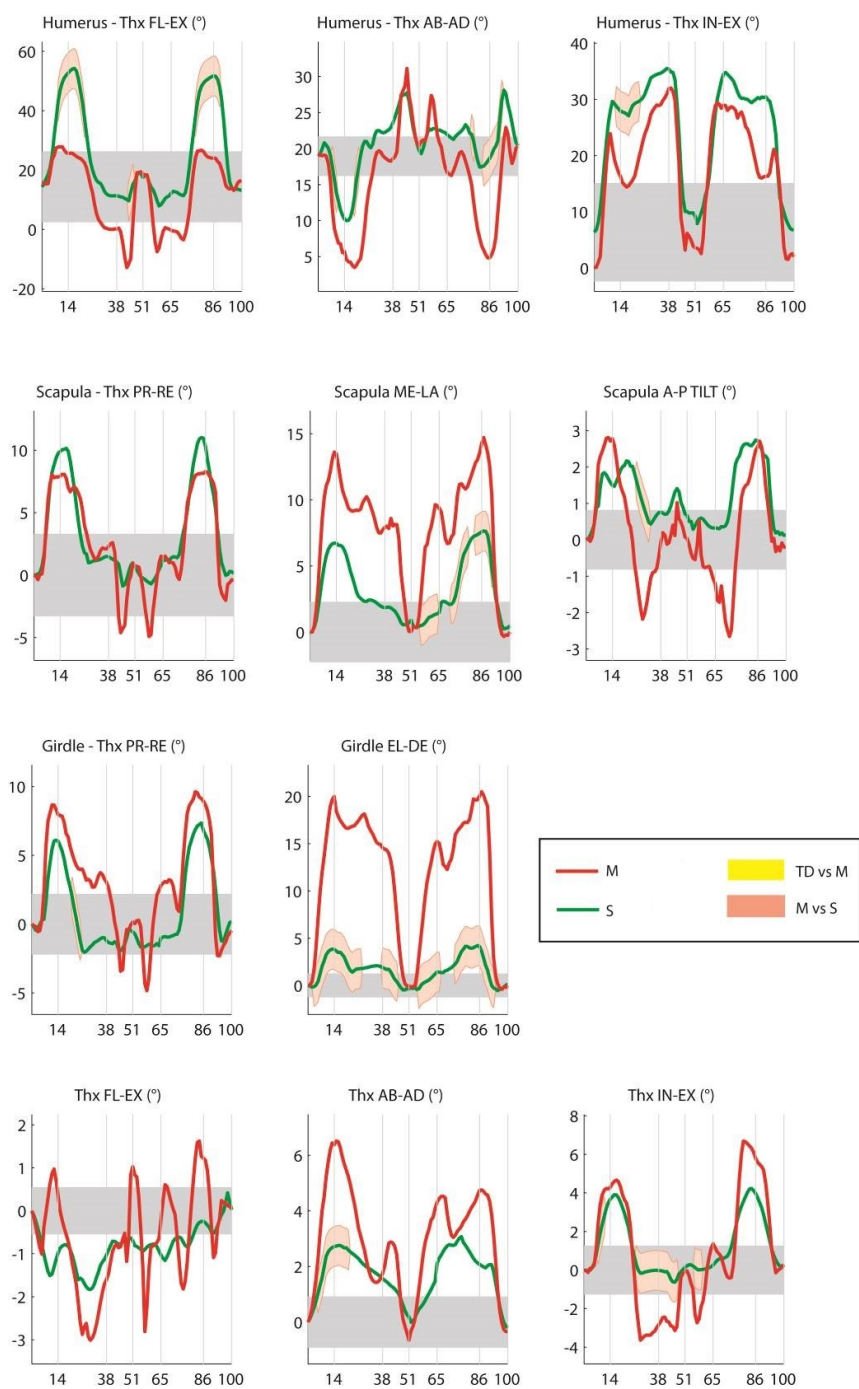

Figure S3: Kinematics for the task Plate, from distal to proximal, as percentage of the motion cycle.

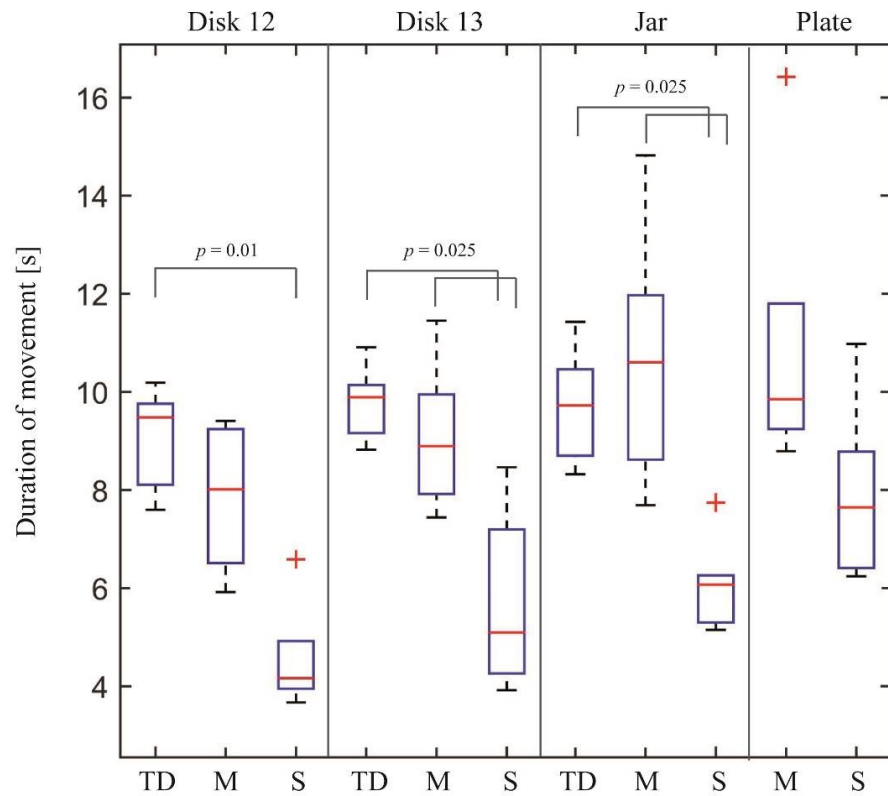

Figure S4: Results for the duration of movement. Each box summarizes 6 values, one per subject, i.e. the median over three repetitions. Results are separately reported for TD, M and S. Statistically significant differences from the Friedman tests and post-hoc comparisons are reported at the top with the associated p-value.
